# Supplementary material
Source: Springer Nature journal article supplement (https://cris.unibo.it/retrieve/5799fa02-8a16-4085-8980-9edcc2df7199/41598_2026_48865_MOESM1_ESM%20%281%29.docx)
Supplement: MOESM1 [file 41598_2026_48865_MOESM1_ESM%20%281%29.docx]

**Supplementary material**

**Supplementary Table S1. Baseline characteristics of patients undergoing total hip arthroplasty (THA) receiving methotrexate monotherapy (analytic cohort) compared with patients receiving methotrexate combination therapy who were excluded from the analysis.**

| THA | MTX combination therapy N = 181*1* | MTX monotherapy N = 225*1* | p-value*2* |
| --- | --- | --- | --- |
| Age |  |  | <0.001 |
| Median (Q1, Q3) | 65.0 (56.0, 70.0) | 70.0 (63.0, 74.0) |  |
| (Min, Max) | (20.0, 87.0) | (33.0, 85.0) |  |
| Mean (SD) | 61.5 (12.6) | 68.1 (8.4) |  |
| Age in class |  |  | <0.001 |
| <40 | 14 (7.7) | 3 (1.3) |  |
| 40-49 | 13 (7.2) | 4 (1.8) |  |
| 50-59 | 35 (19.3) | 20 (8.9) |  |
| 60-69 | 72 (39.8) | 85 (37.8) |  |
| 70-79 | 45 (24.9) | 104 (46.2) |  |
| 80+ | 2 (1.1) | 9 (4.0) |  |
| Sex |  |  | 0.805 |
| F | 134 (74.0) | 163 (72.4) |  |
| M | 47 (26.0) | 62 (27.6) |  |
| BMI |  |  | 0.173 |
| Underweight | 5 (3.1) | 3 (1.5) |  |
| Normal Weight | 68 (42.0) | 66 (33.8) |  |
| Overweight | 56 (34.6) | 88 (45.1) |  |
| Obese | 33 (20.4) | 38 (19.5) |  |
| Unknown | 19 | 30 |  |
| *1* n (%) | | | |
| *2* Wilcoxon rank sum test; Pearson’s Chi-squared test | | | |

**Supplementary Table S2. Baseline characteristics of patients undergoing total knee arthroplasty (TKA) receiving methotrexate monotherapy (analytic cohort) compared with patients receiving methotrexate combination therapy who were excluded from the analysis.**

| TKA | MTX combination therapy N = 149*1* | MTX monotherapy N = 215*1* | p-value*2* |
| --- | --- | --- | --- |
| Age |  |  | <0.001 |
| Median (Q1, Q3) | 65.0 (59.0, 71.0) | 70.0 (64.0, 74.0) |  |
| (Min, Max) | (28.0, 82.0) | (39.0, 85.0) |  |
| Mean (SD) | 64.4 (9.2) | 68.5 (8.5) |  |
| Age in class |  |  | <0.001 |
| <40 | 3 (2.0) | 1 (0.5) |  |
| 40-49 | 4 (2.7) | 5 (2.3) |  |
| 50-59 | 34 (22.8) | 24 (11.2) |  |
| 60-69 | 61 (40.9) | 77 (35.8) |  |
| 70-79 | 43 (28.9) | 95 (44.2) |  |
| 80 e + | 0 (0.0) | 13 (6.0) |  |
| 80+ | 4 (2.7) | 0 (0.0) |  |
| Sex |  |  | 0.812 |
| F | 112 (75.2) | 158 (73.5) |  |
| M | 37 (24.8) | 57 (26.5) |  |
| BMI |  |  | 0.122 |
| Underweight | 4 (3.1) | 0 (0.0) |  |
| Normal Weight | 25 (19.1) | 39 (21.2) |  |
| Overweight | 59 (45.0) | 84 (45.7) |  |
| Obese | 43 (32.8) | 61 (33.2) |  |
| Unknown | 18 | 31 |  |
| *1* n (%) | | | |
| *2* Wilcoxon rank sum test; Pearson’s Chi-squared test | | | |

**Supplementary Figure S1. Survival rate of total hip arthroplasty (THA, panel A) and total knee arthroplasty (TKA, panel B) in rheumatoid arthritis (RA) patients perioperatively treated with methotrexate (MTX) vs propensity score (PS)-matched patients with osteoarthritis (OA).**

**Supplementary Figure S2. Survival rate of total hip arthroplasty (THA, panel A) and total knee arthroplasty (TKA, panel B) in inflammatory arthritis (IA) patients treated with methotrexate (MTX) before AND after surgery vs propensity score (PS)-matched patients with osteoarthritis (OA).**
